# Supplementary material for: Growth Promoting Rhizospheric and Endophytic Bacteria from Curcuma longa L. as Biocontrol Agents against Rhizome Rot and Leaf Blight Diseases
Source: PubMed Central journal article supplement — Plant Pathol J. 2018 Jun 1;34(3):218–35. doi: 10.5423/PPJ.OA.11.2017.0225 (PMC5985648; doi:10.5423/ppj.oa.11.2017.0225), 2018-06-01
Supplement: ppj-34-218_suppl.pdf [file ppj-34-218_suppl.pdf]

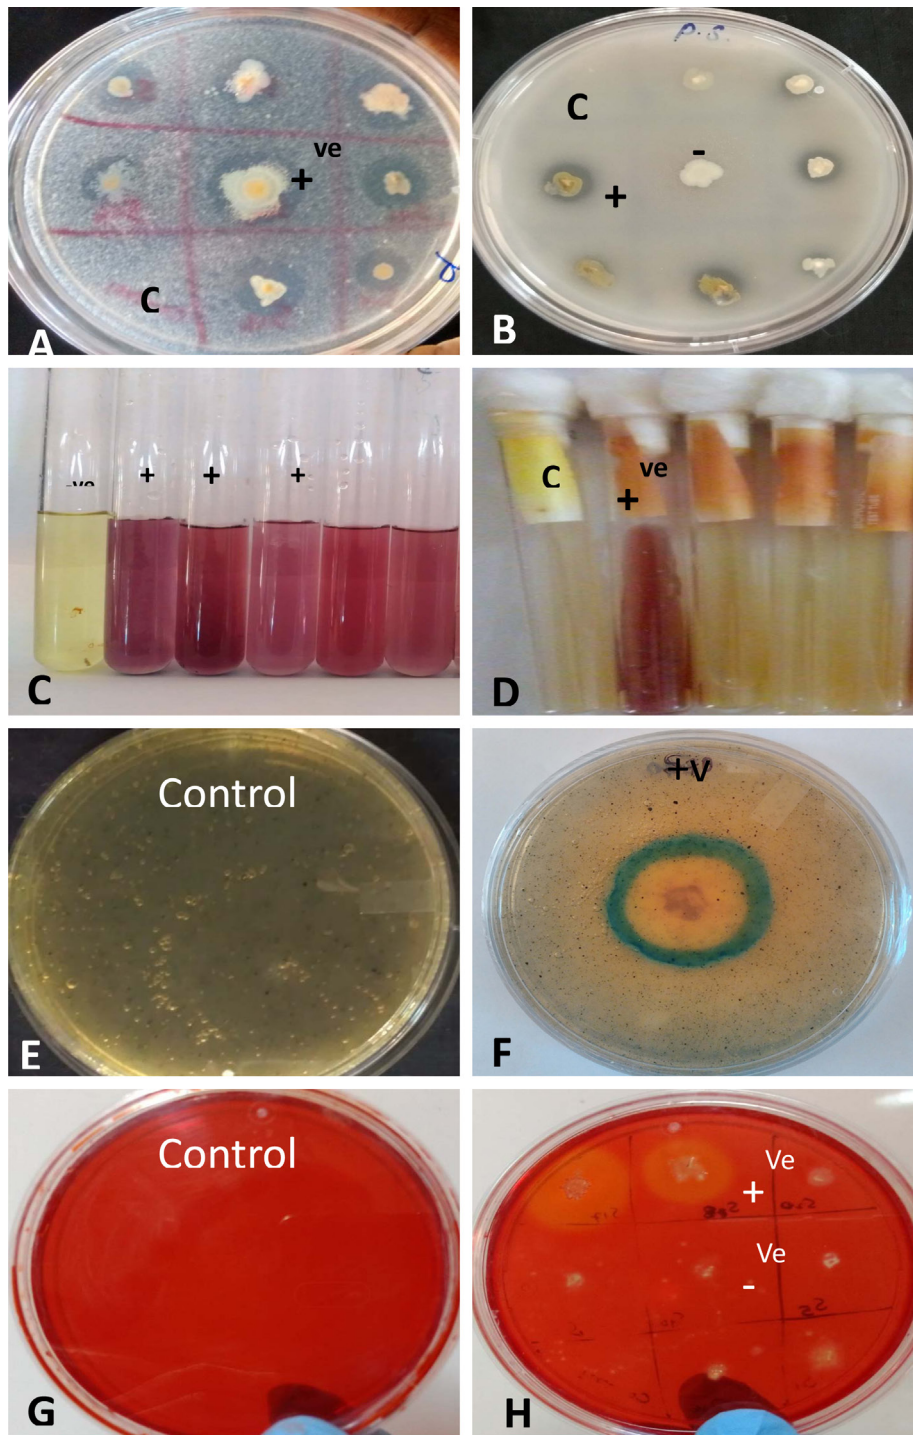

**Supplementary Fig. 1.** Photographs showing plant growth promotion traits; A-Protease activity, B-Phosphate solubilization assay, C-Production of IAA, D-HCN production, E and F-Siderophore production, G and H- Cellulase activity, C=control.

**Supplementary Table 1.** Morphological and biochemical traits of the rhizobacteria isolated from turmeric rhizosphere and endophytic bacteria isolated from turmeric rhizomes

| Bacterial Isolates                                                                              | Morphological traits |            |                   | Biochemical traits |            |         |         |          |                 |               |                   | Genera and number of isolates |                    |                   |     |                                 |
|-------------------------------------------------------------------------------------------------|----------------------|------------|-------------------|--------------------|------------|---------|---------|----------|-----------------|---------------|-------------------|-------------------------------|--------------------|-------------------|-----|---------------------------------|
|                                                                                                 | Shape                | Motility   | Sporulation       | Gram reaction      | Methyl red | Citrate | Oxidase | Catalase | Voges Proskauer | Succinic acid | Starch hydrolysis |                               | Ammonia production | Casein hydrolysis | KOH |                                 |
| Rhizobacterial isolates<br>RBacDOB-S1,S4, S10, S11, S14, S20, S21, S23, S29, S30, S41, S51, S53 | Short rod            | Motile     | Non spore formers | -ve                | -ve        | +ve     | +ve     | +ve      | -ve             | +ve           | -ve               | +ve                           | +ve                | +ve               | +ve | <i>Pseudomonas</i> spp.(22)     |
| Endophytic isolates<br>BacDOB-E3,E4, E8, E9, E11, E15, E17, E19, E30                            | Long rod             | Motile     | Non spore formers | +ve                | -ve        | -ve     | -ve     | +ve      | -ve             | -ve           | -ve               | +ve                           | +ve                | -ve               | -ve | <i>Bacillus</i> spp.(7)         |
| Rhizobacterial isolates<br>RBacDOB-S24, S26, S35,S56                                            | Long rod             | Motile     | Non spore formers | +ve                | -ve        | -ve     | -ve     | +ve      | -ve             | -ve           | -ve               | +ve                           | +ve                | +ve               | +ve | <i>Arthrobacter</i> spp.(1)     |
| Endophytic isolates- BacDOB-E20, E22, E26                                                       | Rod                  | Motile     | Non spore formers | -ve                | +ve        | +ve     | -ve     | +ve      | +ve             | -ve           | -ve               | -ve                           | +ve                | +ve               | +ve | <i>Enterobacter</i> spp.(2)     |
| Endophytic isolate BacDOB-E18                                                                   | Long rod             | Motile     | Non spore formers | -ve                | -ve        | +ve     | +ve     | +ve      | -ve             | -ve           | -ve               | -ve                           | +ve                | +ve               | +ve | <i>Alcaligenes</i> spp.(4)      |
| Rhizobacterial isolate<br>RBacDOB-S70,                                                          | Rod                  | Motile     | Non spore formers | -ve                | +ve        | +ve     | -ve     | +ve      | -ve             | -ve           | -ve               | -ve                           | -ve                | -ve               | -ve | <i>Acinetobacter</i> spp.(4)    |
| Endophytic isolates BacDOB-E21                                                                  | Rod                  | Motile     | Non spore formers | -ve                | -ve        | +ve     | +ve     | +ve      | -ve             | -ve           | -ve               | -ve                           | -ve                | -ve               | -ve | <i>Ochrobactrum</i> spp. (1)    |
| Rhizobacterial isolate<br>RBacDOB-S78                                                           | Rod                  | Motile     | Non spore formers | -ve                | -ve        | +ve     | -ve     | +ve      | -ve             | -ve           | -ve               | -ve                           | +ve                | +ve               | +ve | <i>Exiguobacterium</i> spp. (1) |
| Endophytic isolates- BacDOB-E2, E10, E14                                                        | Rod                  | Motile     | Non spore formers | -ve                | +ve        | -ve     | -ve     | +ve      | +ve             | -ve           | -ve               | -ve                           | -ve                | -ve               | -ve | <i>Rhizobium</i> spp. (1)       |
| Rhizobacterial isolates- RBacDOB-S62,                                                           | Rod                  | Non Motile | Non spore formers | -ve                | +ve        | +ve     | -ve     | +ve      | -ve             | -ve           | -ve               | -ve                           | -ve                | -ve               | -ve | <i>Klebsiella</i> spp. (1)      |
| Endophytic isolates- BacDOB-E12, E24, E34                                                       | Small Rod            | Motile     | Non spore formers | -ve                | -ve        | +ve     | -ve     | +ve      | +ve             | -ve           | -ve               | -ve                           | -ve                | -ve               | -ve | <i>Citrobacter</i> spp. (1)     |
| Rhizobacterial isolate<br>RBacDOB-S52                                                           | Small Rod            | Motile     | Non spore formers | -ve                | +ve        | -ve     | -ve     | +ve      | -ve             | -ve           | -ve               | -ve                           | +ve                | +ve               | +ve | <i>Stenotrophomonas</i> spp.(5) |
| Rhizobacterial isolate RBacDOB-S57                                                              | Rod                  | Motile     | Non spore formers | -ve                | +ve        | -ve     | -ve     | +ve      | -ve             | -ve           | -ve               | -ve                           | -ve                | -ve               | -ve | <i>Brevibacillus</i> spp. (2)   |
| Rhizobacterial isolate<br>RBacDOB-S72                                                           | Rod                  | Motile     | Non spore formers | -ve                | +ve        | -ve     | +ve     | +ve      | +ve             | -ve           | -ve               | -ve                           | -ve                | -ve               | -ve |                                 |
| Endophytic isolate BacDOB-E52                                                                   | Short Rod            | Motile     | Non spore formers | -ve                | -ve        | +ve     | +ve     | +ve      | -ve             | -ve           | -ve               | -ve                           | -ve                | -ve               | -ve |                                 |
| Endophytic isolate BacDOB-E5                                                                    | Rod                  | Motile     | Non spore formers | -ve                | +ve        | +ve     | -ve     | +ve      | +ve             | -ve           | -ve               | -ve                           | +ve                | +ve               | +ve |                                 |
| Rhizobacterial isolate RBacDOB-S6, S9, S16, S36, S40                                            | Rod                  | Motile     | Non spore formers | -ve                | -ve        | +ve     | +ve     | +ve      | -ve             | -ve           | -ve               | -ve                           | -ve                | -ve               | -ve |                                 |
| Rhizobacterial isolate RBacDOB-S18, S74                                                         | Rod                  | Motile     | Non spore formers | -ve                | +ve        | +ve     | -ve     | +ve      | -ve             | -ve           | -ve               | -ve                           | +ve                | +ve               | +ve |                                 |

**Supplementary Table 2.** The PDI of leaf blight disease

| Isolate                               | Sum of individual ratings | Total No. of plants | PDI of leaf blight |
|---------------------------------------|---------------------------|---------------------|--------------------|
| <i>B. cereus</i> RBacDOB-S24          | 14                        | 10                  | 15.5               |
| <i>P. putida</i> RBacDOB-S21          | 15                        | 10                  | 16.6               |
| <i>P. aeruginosa</i> BacDOB-E19       | 16                        | 10                  | 17.7               |
| <i>Enterobacteria</i> BacDOB-E21      | 17                        | 10                  | 18.8               |
| Carbendazim (0.1%) + Mancozeb (0.25%) | 19                        | 10                  | 21.1               |
| Uninoculated control                  | 0                         | 10                  | 0                  |
| Pathogenic control                    | 70                        |                     | 77.7               |

The values are mean of three replicates.
